# Supplementary material
Source: Springer Nature journal article supplement (https://www.springermedizin.de/resource/supplementary/12865_2012_523_MOESM5_ESM.pdf/9428128)
Supplement: MOESM5 [file 9428128]

|   | 1              | 2              | 3              | 4             | 5             | 6             | 7             | 8              | 9                | 10            | 11            | 12              |
|---|----------------|----------------|----------------|---------------|---------------|---------------|---------------|----------------|------------------|---------------|---------------|-----------------|
| A | <i>Asb2</i>    | <i>Cacna1f</i> | <i>Ccl11</i>   | <i>Ccl7</i>   | <i>Ccr3</i>   | <i>Ccr4</i>   | <i>Ccr6</i>   | <i>Cebpb</i>   | <i>Chd7</i>      | <i>Fasl</i>   | <i>Fosl1</i>  | <i>Gata3</i>    |
| B | <i>Gata4</i>   | <i>Gfi1</i>    | <i>Gpr44</i>   | <i>Havcr2</i> | <i>Ifng</i>   | <i>Hoxa10</i> | <i>Hoxa3</i>  | <i>Icos</i>    | <i>IL21</i>      | <i>Igfs6</i>  | <i>Ikzf2</i>  | <i>Il12b</i>    |
| C | <i>Il12rb2</i> | <i>Il13</i>    | <i>Il13ra1</i> | <i>Il17a</i>  | <i>Il17re</i> | <i>Il23</i>   | <i>Il18r1</i> | <i>Il18rap</i> | <i>Il1r1</i>     | <i>Il1r2</i>  | <i>Il1rl1</i> | <i>Il2ra</i>    |
| D | <i>Il4ra</i>   | <i>Tgfb</i>    | <i>Irf1</i>    | <i>Irf4</i>   | <i>Irf8</i>   | <i>Jak1</i>   | <i>Lrrc32</i> | <i>Maf</i>     | <i>Myb</i>       | <i>Nfatc1</i> | <i>Nfatc2</i> | <i>Nfatc2ip</i> |
| E | <i>Nr4a1</i>   | <i>Nr4a3</i>   | <i>Perp</i>    | <i>Pkd2</i>   | <i>Pou2f2</i> | <i>Pparg</i>  | <i>Rora</i>   | <i>Runx1</i>   | <i>Runx3</i>     | <i>Socs1</i>  | <i>Socs5</i>  | <i>Stat1</i>    |
| F | <i>Stat4</i>   | <i>Stat6</i>   | <i>Tbx21</i>   | <i>Tgif1</i>  | <i>Il4</i>    | <i>Il10</i>   | <i>Tmed1</i>  | <i>Tnfrsf9</i> | <i>Trp53inp1</i> | <i>Uts2</i>   | <i>Zbtb7b</i> | <i>Zeb1</i>     |
| G | <i>Il5</i>     | <i>Ddx58</i>   | <i>Ifna2</i>   | <i>Ifnb1</i>  | <i>Il12a</i>  | <i>Il6</i>    | <i>Irf3</i>   | <i>Mapk1</i>   | <i>Tnf</i>       | <i>Mx1</i>    | <i>Oas2</i>   | <i>Traf6</i>    |
| H | <i>Ccl2</i>    | <i>Ccl3</i>    | <i>Ccl4</i>    | <i>Ccl5</i>   | <i>Cxcl2</i>  | <i>Tcrb</i>   | <i>Cd4</i>    | <i>Cd8a</i>    | <i>Foxp3</i>     | <i>Lta</i>    | <i>Gapdh</i>  | <i>Gapdh</i>    |
